# Supplementary material
Source: HighWire-hosted journal article supplement (https://ijgc.bmj.com/highwire/filestream/22691/field_highwire_adjunct_files/0/ijgc-2021-002473supp001_data_supplement.pdf)
Supplement: ijgc-2021-002473supp001_data_supplement.pdf [file ijgc-2021-002473supp001_data_supplement.pdf]

Supplement A. Full overview of the patients and treatment characteristics, and treatment outcomes of the included studies

| Author      | Journal  | Year | RCT/<br>cohort | Treatment arms | Mono/multi<br>center | Prospective/<br>retrospective | Median FU<br>(months) | Patient<br>numbers | Age (years) | FIGO Stage |          |          |          | Total Dose<br>EBRT | Boost<br>brachy | type of HT | HT sessions<br>≥4x n (%) | Chemotherapy (dose,<br>frequency)                    | Outcome           |                   |                   | HT-related toxicity ≥grade 3                                                |
|-------------|----------|------|----------------|----------------|----------------------|-------------------------------|-----------------------|--------------------|-------------|------------|----------|----------|----------|--------------------|-----------------|------------|--------------------------|------------------------------------------------------|-------------------|-------------------|-------------------|-----------------------------------------------------------------------------|
|             |          |      |                |                |                      |                               |                       |                    |             | I          | II       | III      | IV       |                    |                 |            |                          |                                                      | LC/PC             | DSS/DFS           | OS                |                                                                             |
| Harima      | IJH      | 2001 | RCT            | RT vs. RHT     | Mono                 | Prospective                   | 36                    | 40                 | 62 vs. 65   | 0 (0)      | 0 (0)    | 40 (100) | 0 (0)    | 52.2 Gy            | Yes             | Capacitive | 3 Sessions               |                                                      | <b>10 vs. 16*</b> | <b>10 vs. 16*</b> | 48 vs. 58*        | 2/20 (10) at 3 years; not significant different from RT alone               |
| Van der Zee | IJH      | 2002 | RCT            | RT vs. RHT     | Multi                | Prospective                   | 43                    | 114                | 56 vs. 58   | 0 (0)      | 22 (19)  | 81 (71)  | 11 (10)  | 46-50.4 Gy         | Yes             | Radiative  | 40/58 (69)               |                                                      | <b>41 vs. 61*</b> | N.A.              | <b>27 vs. 51*</b> | No significant difference between treatment groups.                         |
| Vasanathan  | IJROBP   | 2005 | RCT            | RT vs. RHT     | Multi                | Prospective                   | 16                    | 110                | 50 vs. 45   | 0 (0)      | 56 (51)  | 51 (46)  | 3 (3)    | 50 Gy              | Yes             | Capacitive | N.A.                     |                                                      | 69*               | N.A.              | 73*               | Acute tox grade 3: 1x blister 1/55 (2); Late tox grade 3: 2x bowel 2/55 (4) |
| Lutgens     | RO       | 2016 | RCT            | CRT vs. RHT    | Multi                | Prospective                   | 85                    | 84                 | 53          | 18 (21)    | 46 (55)  | 18 (21)  | 2 (3)    | 50 Gy              | Yes             | Radiative  | 38/42 (90)               | weekly cispl 40mg/m2                                 | N.A.              | 1.15^             | 1.04^             | No significant difference between treatment groups.                         |
| Harima      | IJH      | 2016 | RCT            | CRT vs. RCHT   | Multi                | Prospective                   | 55                    | 101                | 62 vs. 60   | 1 (1)      | 26 (26)  | 66 (65)  | 8 (8)    |                    | Yes             | Capacitive | 47/51 (92)               | weekly cispl 30-40 mg/m2                             | 71 vs. 80         | 61 vs. 71         | 65 vs. 78         | No hyperthermia related toxicity was observed                               |
| Minnaar     | Plos One | 2019 | RCT            | CRT vs. RCHT   | Mono                 | Prospective                   | 6                     | 202                | 49 vs. 48   | 0 (0)      | 75 (36)  | 2 (1)    | 129 (63) | 50 Gy              | Yes             | Capacitive | N.A.                     | 2x cispl 80mg/m2 during EBRT in 21 days              | 20 vs. 39†        | <b>20 vs. 39†</b> | 82 vs. 87†        | No significant difference between treatment groups.                         |
| Wang        | IJROBP   | 2020 | RCT            | CRT vs. RCHT   | Mono                 | Prospective                   | 60                    | 373                | 50 vs. 51   | 7 (2)      | 230 (62) | 127 (34) | 9 (2)    | 50.4 Gy            | Yes             | Capacitive | 175/182 (96)             | cispl 30 mg/m2, d1-3; 5-fluorouracil 350 mg/m2, d1-5 | N.A.              | 83 vs. 87         | <b>72 vs. 82</b>  | No significant difference between treatment groups.                         |
| Franckena   | IJROBP   | 2009 | Cohort         |                | Multi                | Retrospective                 | 44                    | 378                | 58          | 13 (3)     | 160 (42) | 163 (43) | 42 (11)  | 46-50.4 Gy         | Yes             | Radiative  | 339/378 (90)             |                                                      | 53                | 47                | 40                | 45/378 (12) at 5 years; No significant different from RT alone              |
| Westermann  | IJH      | 2012 | Cohort         |                | Multi                | Prospective                   | 81                    | 68                 | 45          | 3 (4)      | 42 (62)  | 21 (31)  | 2 (3)    | 45-50.4 Gy         | Yes             | Radiative  | 63/68 (93)               | weekly cispl 40mg/m2                                 | 20 vs. 39         | <b>20 vs. 39</b>  | 82 vs. 87         | No significant difference between treatment groups.                         |
| Kroesen     | OBNAS    | 2019 | Cohort         |                | Mono                 | Retrospective                 | 52                    | 227                | 54          | 32 (14)    | 118 (52) | 53 (23)  | 24 (11)  | 46-50.4 Gy         | Yes             | Radiative  | 219/227 (96)             |                                                      | 73                | 60^^              | 40^^              | No significant difference between treatment groups.                         |

FIGO: International Federation of Gynecology and Obstetrics stage 2008; RCT: randomized control trial; RT: radiotherapy; RHT: radiotherapy and hyperthermia; CRT: chemoradiation; RCHT: chemoradiation with hyperthermia; FU: follow-up; LC: local control; PC: pelvic control; DFS: disease free survival; DSS: disease specific survival; OS: overall survival; cispl: cisplatin; N.A.: not available; vs.: versus; \*: based on 3-year follow up; ^: based on 7-years follow-up; †: based on 6 months follow up; ^^: based on 12-years follow-up; bold: significant different;
